# Supplementary material
Source: MDPI journal article supplement (https://www.mdpi.com/2073-445X/11/11/2022)
Supplement: s1 [file s1]

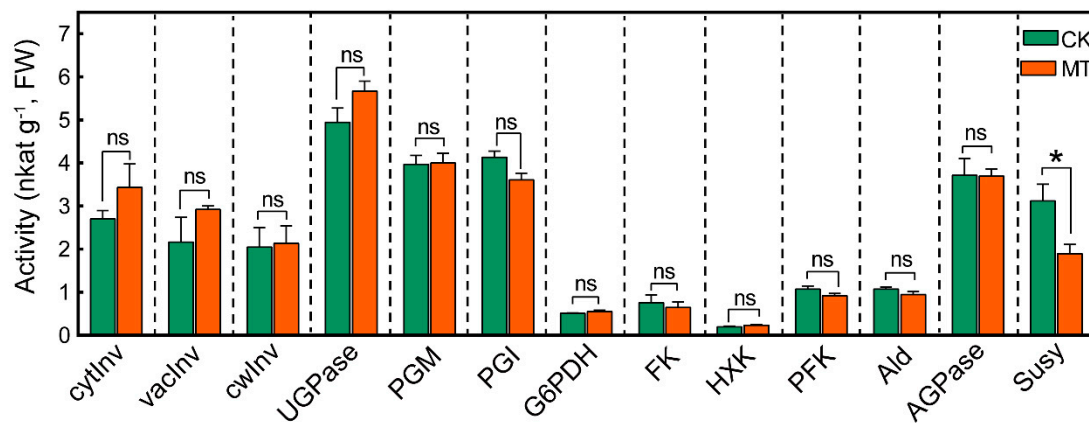

**Figure S1:** Activities of key carbohydrate metabolism enzymes in the leaves of *Phragmites australis* under control (CK) and melatonin (MT) conditions. Ald, aldolase; UGPase, UDP-glucose pyrophosphorylase; Susy, sucrose synthase; AGPase, ADP-glucose pyrophosphorylase; HXK, hexokinase; PGI, phosphoglucomutase; G6PDH, glucose-6-phosphate dehydrogenase; PFK, phosphofructokinase; PGM, phosphoglucomutase; FK, fructokinase; vacInv, vacuolar invertase; cytlInv, cytoplasmic invertase; cwInv, cell wall invertase. ns indicates not significant and “\*” indicates significance at  $p < 0.05$ . Data are expressed as means  $\pm$  SE ( $n = 3$ ).

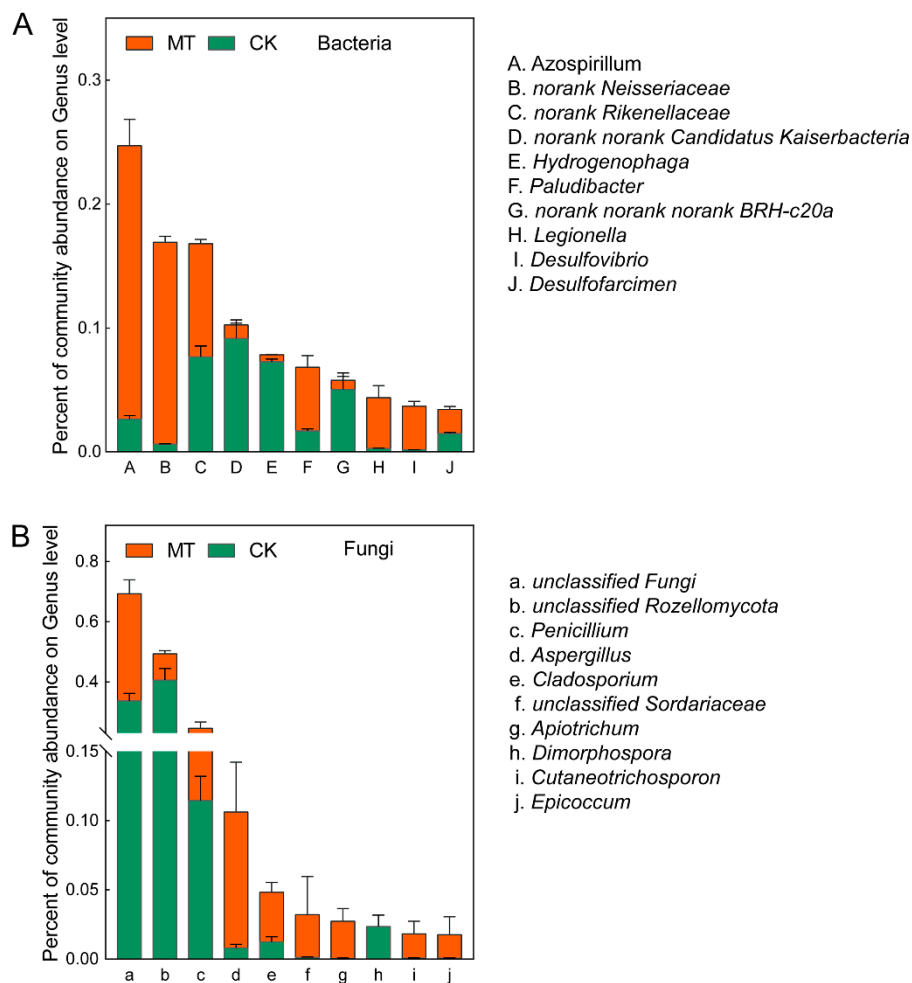

**Figure S2:** Changes in the relative abundance of bacteria (A) and fungi (B) after treatment for 7 days under control (CK) and melatonin (MT) conditions in wastewater at the genus level. Data are expressed as means  $\pm$  SE ( $n = 3$ ).

**Table S1:** Mantel test based on the unweighted-unifrac distance between the microbial community at genus level in CWs and pollutant contents in the effluent.

| <b>Mantel test</b> | <b><i>r</i></b> | <b>p-value</b> | <b>Number of<br/>permutations</b> | <b>Tail type</b> |
|--------------------|-----------------|----------------|-----------------------------------|------------------|
| <b>Bacteria</b>    | 0.62806         | 0.012          | 999                               | two-side         |
| <b>Fungi</b>       | 0.65328         | 0.011          | 999                               | two-side         |
