# Supplementary material
Source: MDPI journal article supplement (https://www.mdpi.com/2073-445X/11/11/2022)
Supplement: s1 [file s1]

Archive with 1 entries (1 files):
- land-2024554-supplementary.pdf
